# Supplementary material
Source: PubMed Central journal article supplement (PMC10766868)
Supplement: NIHMS1921334-supplement-1.pdf [file NIHMS1921334-supplement-1.pdf]

## Supporting Information

**A miniaturized, battery-free, wireless wound monitor that predicts wound closure rate early**

*Nate T. Garland, Joseph W. Song, Tengfei Ma, Yong Jae Kim, Abraham Vázquez-Guardado, Ayemeh Bagheri Hashkavayi, Sankalp Koduvayur Ganeshan, Nivesh Sharma, Hanjun Ryu, Min-Kyu Lee, Brandon Sumpio, Margaret A. Jakus, Viviane Forsberg, Rajaram Kaveti, Samuel K. Sia, Aristidis Veves, John A. Rogers, Guillermo A. Ameer, Amay J. Bandodkar*

\*Corresponding authors: Amay J. Bandodkar, [ajbandod@ncsu.edu](mailto:ajbandod@ncsu.edu);  
Guillermo A. Ameer, [g-ameer@northwestern.edu](mailto:g-ameer@northwestern.edu);  
John A. Rogers, [jrogers@northwestern.edu](mailto:jrogers@northwestern.edu)

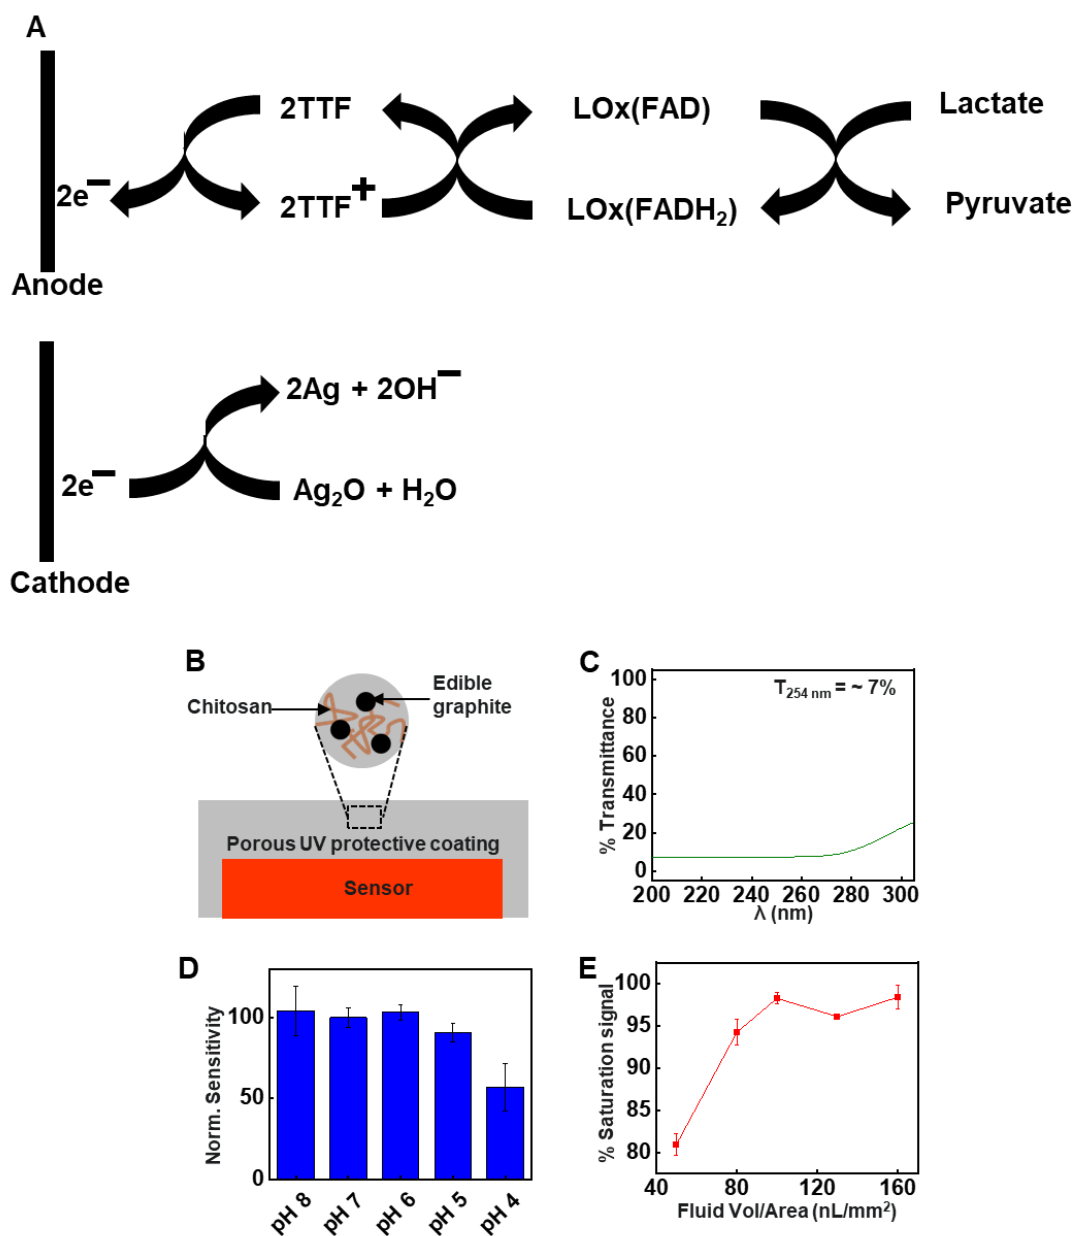

**Figure S1.** (A) Schematic representation of the reactions occurring at the biofuel cell-based lactate sensor. (B) Scheme showing UV protective coating layer over the lactate sensor. (C) UV transmittance spectrum for the UV protective coating. (D) Effect of pH on sensor sensitivity. (E) Percent saturation signal as a function of fluid volume per surface area of a phantom wound. (D,E) Data presented as mean  $\pm$  S.D.,  $n=3$ .

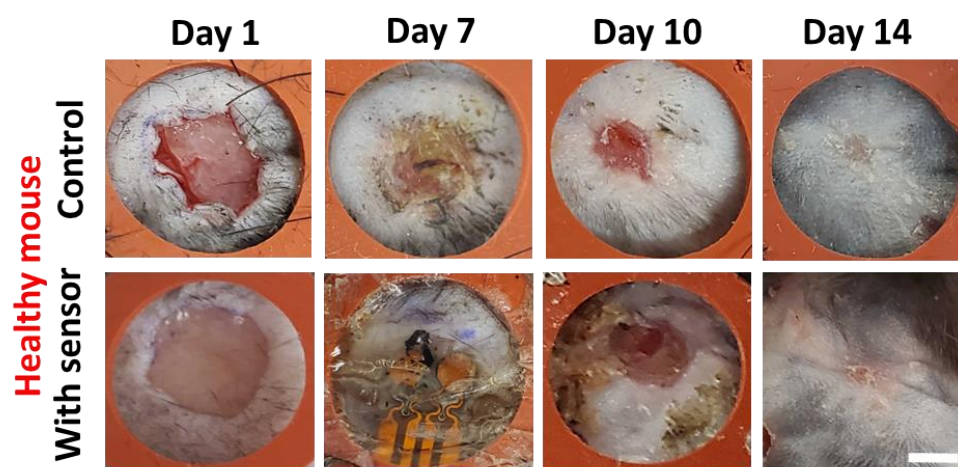

**Figure S2.** Effect of the sensor on long-term wound closure process. Scale bar: 2.5 mm.

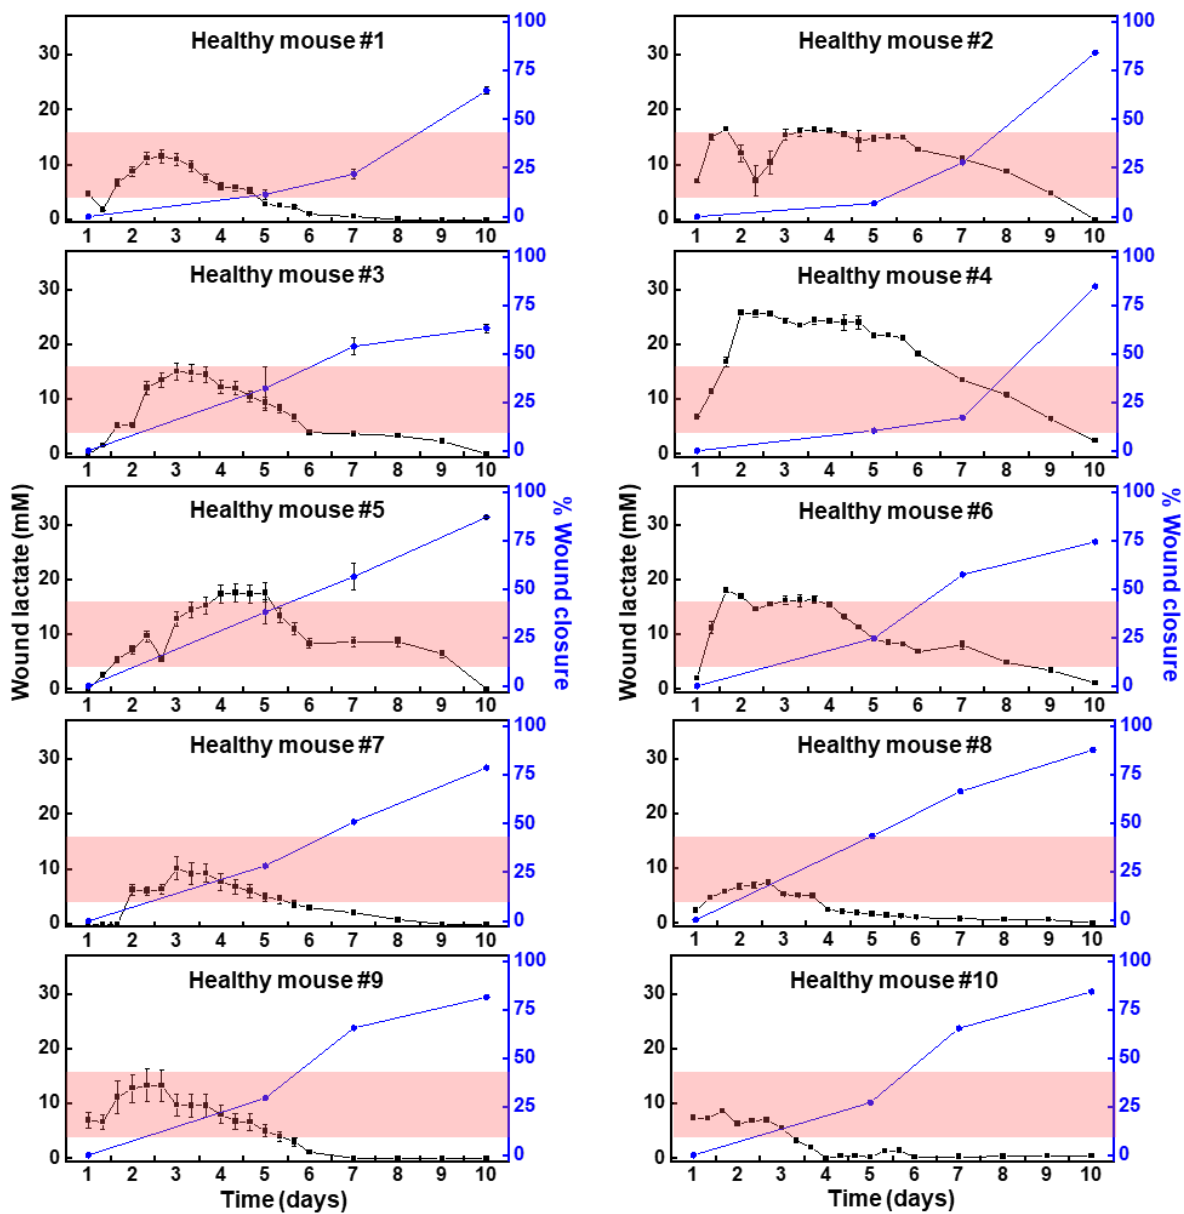

**Figure S3.** Individual plots for measured lactate level and % wound closure for each healthy mouse. Pink region represents healthy wound lactate range. Data presented as mean  $\pm$  S.D., n=60.

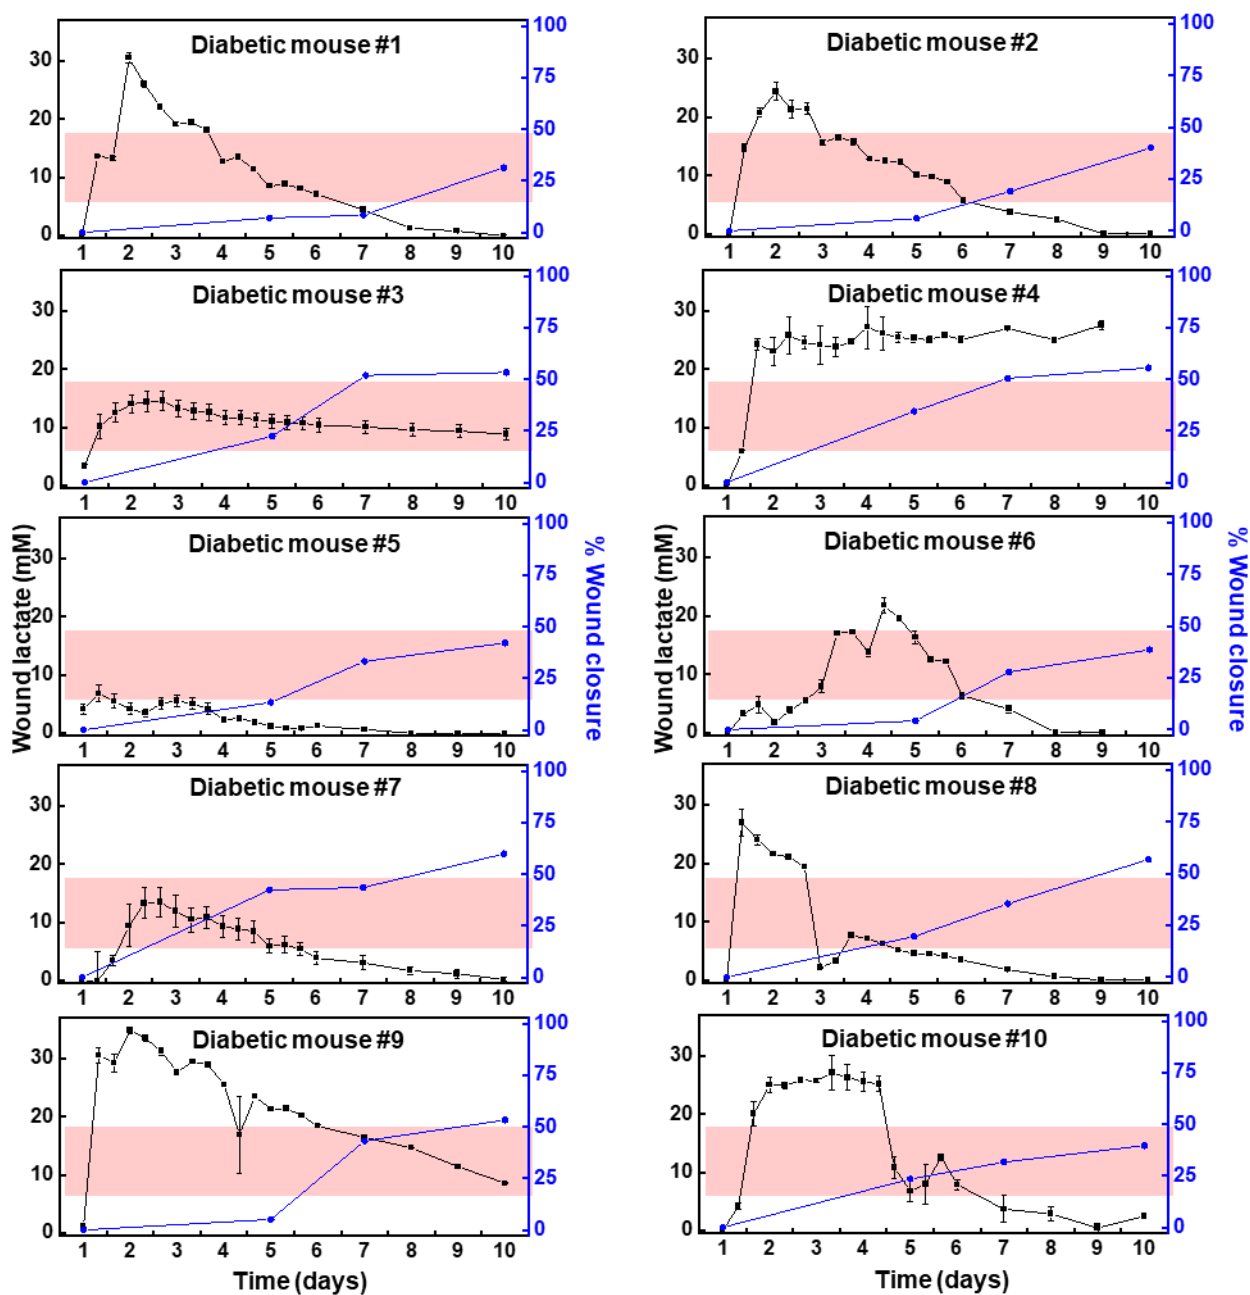

**Figure S4.** Individual plots for measured lactate level and % wound closure for each diabetic mouse. Pink region represents healthy wound lactate range. Data presented as mean  $\pm$  S.D.,  $n=60$ .

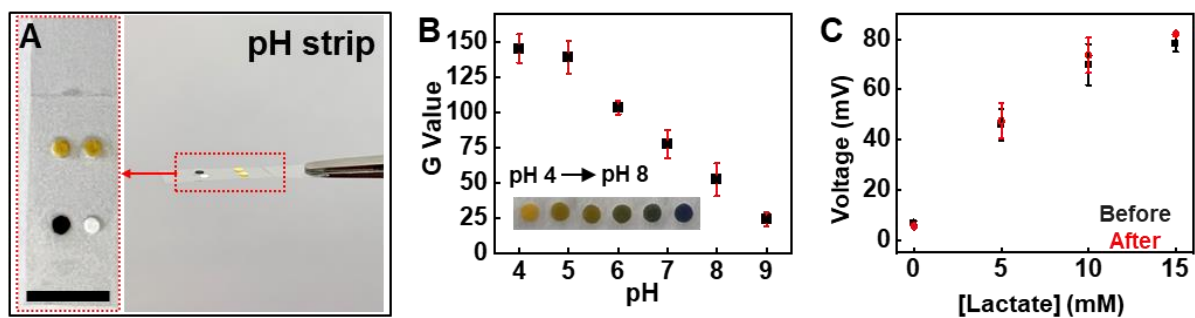

**Figure S5.** (A) Image of the pH strip. Scale bar 5 mm. (B) Calibration plot for the pH assays (data presented as mean  $\pm$  S.D.,  $n=4$ ). (C) Data demonstrating the ability of the lactate sensor to perform in constricted body regions subjected to cyclical and continuous loading. The study involves applying three sensors to the heel of a healthy human subject (male; weight: 70 kg). The heel is selected as the region of interest due to its high risk of developing chronic wounds. The subject continuously walks for 30 min followed by standing still for 15 min. Data presented as mean  $\pm$  S.D.,  $n=60$ .

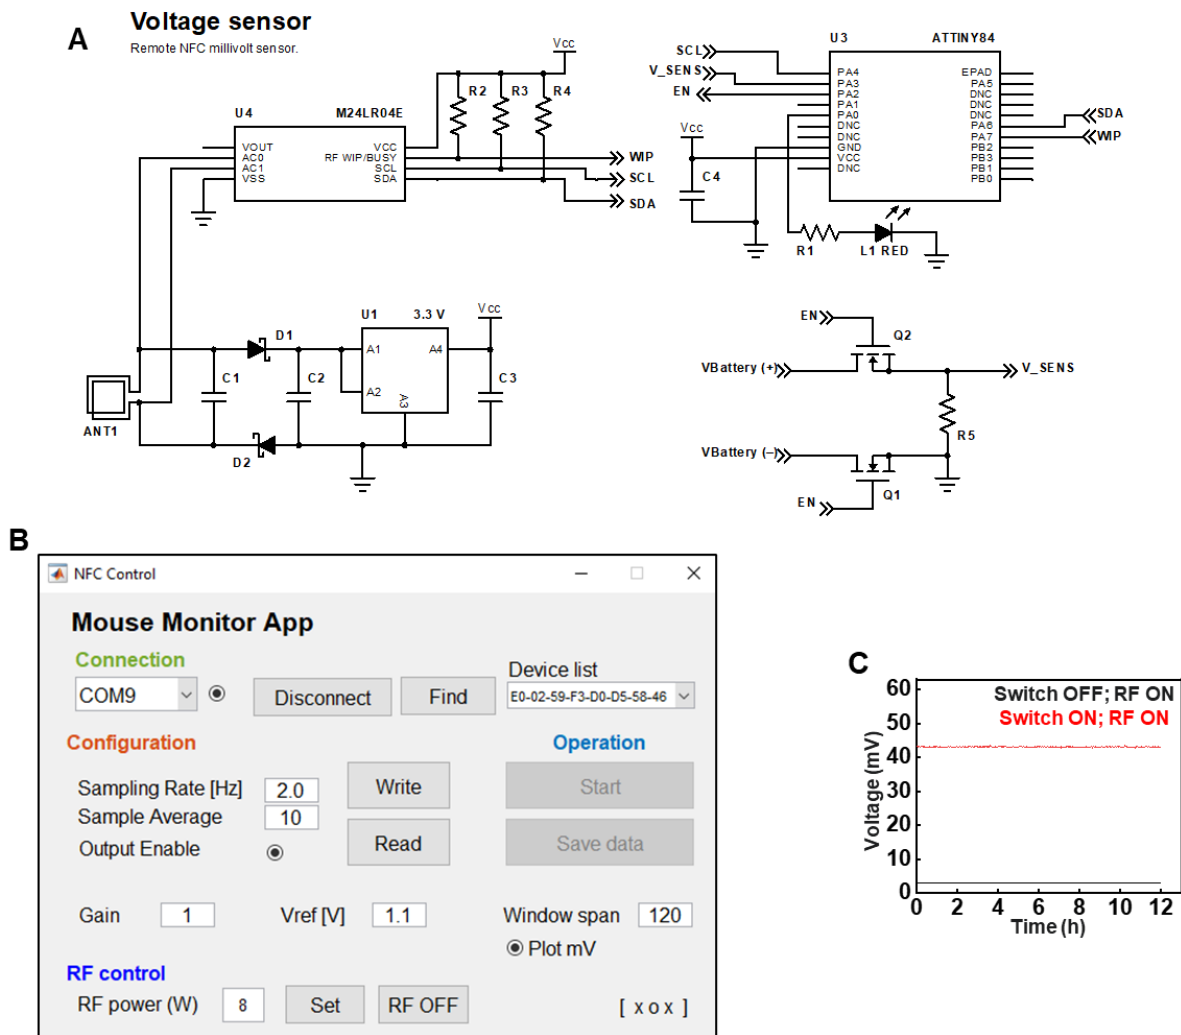

**Fig. S6.** (A) Detailed circuit design of wireless electronics. (B) Screenshot of the GUI for data acquisition. (C) Effectiveness of the MOSFET switch to electronically couple the sensor to wireless electronics only during data acquisition period.

**Table S1:** Comparison of present work with some representative examples of wound monitors published since year 2020.

| Wound parameters measured                                                                                                                                      | In vivo model  | Additional features                                                                | Wound closure prediction | Data transmission | Power source                                                      | Footprint             | Ref. |
|----------------------------------------------------------------------------------------------------------------------------------------------------------------|----------------|------------------------------------------------------------------------------------|--------------------------|-------------------|-------------------------------------------------------------------|-----------------------|------|
| Temperature                                                                                                                                                    | Mini pig       | UV-triggered gentamicin antibiotic applied to wound based on wound temperature     | No                       | Bluetooth         | Battery                                                           | *15 cm <sup>2</sup>   | [1]  |
| pH, uric acid, lactate, temperature, ammonium, glucose                                                                                                         | Diabetic rat   | Electrical stimulation electrodes, iontophoretic delivery of c-terminal peptide-25 | No                       | Bluetooth         | Battery                                                           | *11 cm <sup>2</sup>   | [2]  |
| Cathepsin, humidity, pH, temperature                                                                                                                           | Mouse          | Electrical stimulation electrodes, wound healing photothermal IR LED               | No                       | Bluetooth         | Battery                                                           | * 32 cm <sup>2</sup>  | [3]  |
| Tumor necrosis factor- $\alpha$ , interleukin-6 (IL-6), IL-8, transforming growth factor- $\beta$ 1, microbial burden (Staphylococcus aureus), temperature, pH | Mouse          | -                                                                                  | No                       | Bluetooth         | Battery                                                           | * 89 cm <sup>2</sup>  | [4]  |
| DNA from parthenogenic bacteria in wounds                                                                                                                      | Mouse          | -                                                                                  | No                       | NFC               | Battery free sensing, power source required for data transmission | * 2 cm <sup>2</sup>   | [5]  |
| Wound impedance                                                                                                                                                | Mouse          | Electrical stimulation electrodes                                                  | No                       | NFC               | NFC wireless power transfer                                       | * 3 cm <sup>2</sup>   | [6]  |
| Wound impedance, temperature                                                                                                                                   | Mouse          | Electrical stimulation electrodes, temperature reversible skin adhesion            | No                       | NFC               | Radio frequency energy harvesting                                 | * 20 cm <sup>2</sup>  | [7]  |
| Sodium, potassium, calcium, pH, uric acid, and temperature                                                                                                     | Rat            | -                                                                                  | No                       | Bluetooth         | Battery                                                           | * 10 cm <sup>2</sup>  | [8]  |
| pH                                                                                                                                                             | Human wounds   | -                                                                                  | Yes                      | RFID              | Passive electronics                                               | * 13 cm <sup>2</sup>  | [9]  |
| Temperature, strain, glucose                                                                                                                                   | Diabetic mouse | Zwitterionic hydrogel to promote wound healing                                     | No                       | Wired             | Externally powered                                                | * 2.4 cm <sup>2</sup> | [10] |



| Wound parameters measured                            | In vivo model                  | Additional features                           | Wound closure prediction | Data transmission        | Power source                     | Footprint            | Ref.      |
|------------------------------------------------------|--------------------------------|-----------------------------------------------|--------------------------|--------------------------|----------------------------------|----------------------|-----------|
| Temperature, uric acid, pH                           | Rat                            | Cefazolin antibiotic drug delivery electrodes | No                       | NFC                      | NFC wireless power transfer      | 10 cm <sup>2</sup>   | [11]      |
| Temperature, pH, trimethylamine, uric acid, moisture | Rat                            | -                                             | No                       | Smartphone image capture | None, colorimetric assay         | 3.24 cm <sup>2</sup> | [12]      |
| Lactate                                              | Diabetic mouse / healthy mouse | -                                             | Yes                      | NFC                      | Self-powered biofuel cell sensor | 1.7 cm <sup>2</sup>  | This work |

\*: estimated

## References

- [1] Q. Pang, D. Lou, S. Li, G. Wang, B. Qiao, S. Dong, L. Ma, C. Gao, Z. Wu, *Adv. Sci.* **2020**, *7*, 1902673.
- [2] E. Shirzaei Sani, C. Xu, C. Wang, Y. Song, J. Min, J. Tu, S. A. Solomon, J. Li, J. L. Banks, D. G. Armstrong, W. Gao, *Sci. Adv.* **2023**, *9*, eadf7388.
- [3] S. M. Yang, H. Kim, G. Ko, J. C. Choe, J. H. Lee, K. Rajaram, B. An, W. B. Han, D. Kim, J. Shin, T. Jang, H. Kang, S. Han, K. Lee, S. J. Oh, S. Hwang, *Nano Today* **2022**, *47*, 101685.
- [4] Y. Gao, D. T. Nguyen, T. Yeo, S. B. Lim, W. X. Tan, L. E. Madden, L. Jin, J. Y. K. Long, F. A. B. Aloweni, Y. J. A. Liew, M. L. L. Tan, S. Y. Ang, S. D. / Maniya, I. Abdelwahab, K. P. Loh, C. Chen, D. L. Becker, D. Leavesley, J. S. Ho, C. T. Lim, *Sci. Adv.* **2021**, *7*, eabg9614.
- [5] Z. Xiong, S. Achavananthadith, S. Lian, L. E. Madden, Z. X. Ong, W. Chua, V. Kalidasan, Z. Li, Z. Liu, P. Singh, H. Yang, S. P. Heussler, S. M. P. Kalaiselvi, M. B. H. Breese, H. Yao, Y. Gao, K. Sanmugam, B. C. K. Tee, P. Chen, W. Loke, C. T. Lim, G. S. H. Chiang, B. Y. Tan, H. Li, D. L. Becker, J. S. Ho, *Sci. Adv.* **2021**, *7*, eabj1617.
- [6] J. W. Song, H. Ryu, W. Bai, Z. Xie, A. Vázquez-Guardado, K. Nandoliya, R. Avila, G. Lee, Z. Song, J. Kim, M. Lee, Y. Liu, M. Kim, H. Wang, Y. Wu, H. Yoon, S. S. Kwak, J. Shin, K. Kwon, W. Lu, X. Chen, Y. Huang, G. A. Ameer, J. A. Rogers, *Sci. Adv.* **2023**, *9*, eade4687.
- [7] Y. Jiang, A. A. Trotsyuk, S. Niu, D. Henn, K. Chen, C. Shih, M. R. Larson, A. Mermin-Bunnell, S. Mittal, J. Lai, A. Saberi, E. Beard, S. Jing, D. Zhong, S. R. Steele, K. Sun, T. Jain, E. Zhao, C. R. Neimeth, W. G. Viana, J. Tang, D. Sivaraj, J. Padmanabhan, M. Rodrigues, D. P. Perrault, A. Chattopadhyay, Z. N. Maan, M. C. Leeolou, C. A. Bonham, S. H. Kwon, H. C. Kussie, K. S. Fischer, G. Gurusankar, K. Liang, K. Zhang, R. Nag, M. P. Snyder, M. Januszyk, G. C. Gurtner, Z. Bao, *Nat. Biotechnol.* **2023**, *41*, 652.
- [8] Z. Liu, J. Liu, T. Sun, D. Zeng, C. Yang, H. Wang, C. Yang, J. Guo, Q. Wu, H. Chen, X. Xie, *ACS Sens.* **2021**, *6*, 3112.
- [9] S. Kalasin, P. Sangnuang, W. Surareungchai, *Anal. Chem.* **2022**, *94*, 6842.
- [10] H. Guo, M. Bai, Y. Zhu, X. Liu, S. Tian, Y. Long, Y. Ma, C. Wen, Q. Li, J. Yang, L. Zhang, *Adv. Funct. Mater.* **2021**, *31*, 2106406.
- [11] G. Xu, Y. Lu, C. Cheng, X. Li, J. Xu, Z. Liu, J. Liu, G. Liu, Z. Shi, Z. Chen, F. Zhang, Y. Jia, D. Xu, W. Yuan, Z. Cui, S. S. Low, Q. Liu, *Adv. Funct. Mater.* **2021**, *31*, 2100852.
- [12] X. T. Zheng, Z. Yang, L. Sutarlie, M. Thangaveloo, Y. Yu, N. A. B. M. Salleh, J. S. Chin, Z. Xiong, D. L. Becker, X. J. Loh, B. C. K. Tee, X. Su, *Sci. Adv.* **2023**, *9*, eadg6670.
